# Supplementary material
Source: publisher figshare collection journal article supplement (https://acs.figshare.com/ndownloader/files/22494725)
Supplement: Supplementary file 1 [file 22494725]

# Supporting Information

## Influence of interlayer stacking on gate-induced carrier accumulation in bilayer MoS<sub>2</sub>

Mina Maruyama,<sup>\*,†</sup> Kosuke Nagashio,<sup>‡</sup> and Susumu Okada<sup>¶</sup>

<sup>†</sup>*Department of Physics, Graduate School of Pure and Applied Sciences, University of Tsukuba, 1-1-1 Tennodai, Tsukuba, Japan*

<sup>‡</sup>*Department of Materials Engineering, Graduate School of Engineering, The University of Tokyo, 7-3-1 Hongo, Tokyo 113-8656, Japan*

<sup>¶</sup>*Department of Physics, Graduate School of Pure and Applied Sciences, University of Tsukuba, 1-1-1 Tennodai, Tsukuba 305-8571, Japan*

E-mail: mmaruyama@comas.frsc.tsukuba.ac.jp

Phone: +81 (0)29 853 5921. Fax: +81 (0)29 853 5924

# Electronic structures of bilayer MoS<sub>2</sub> with twisted arrangement

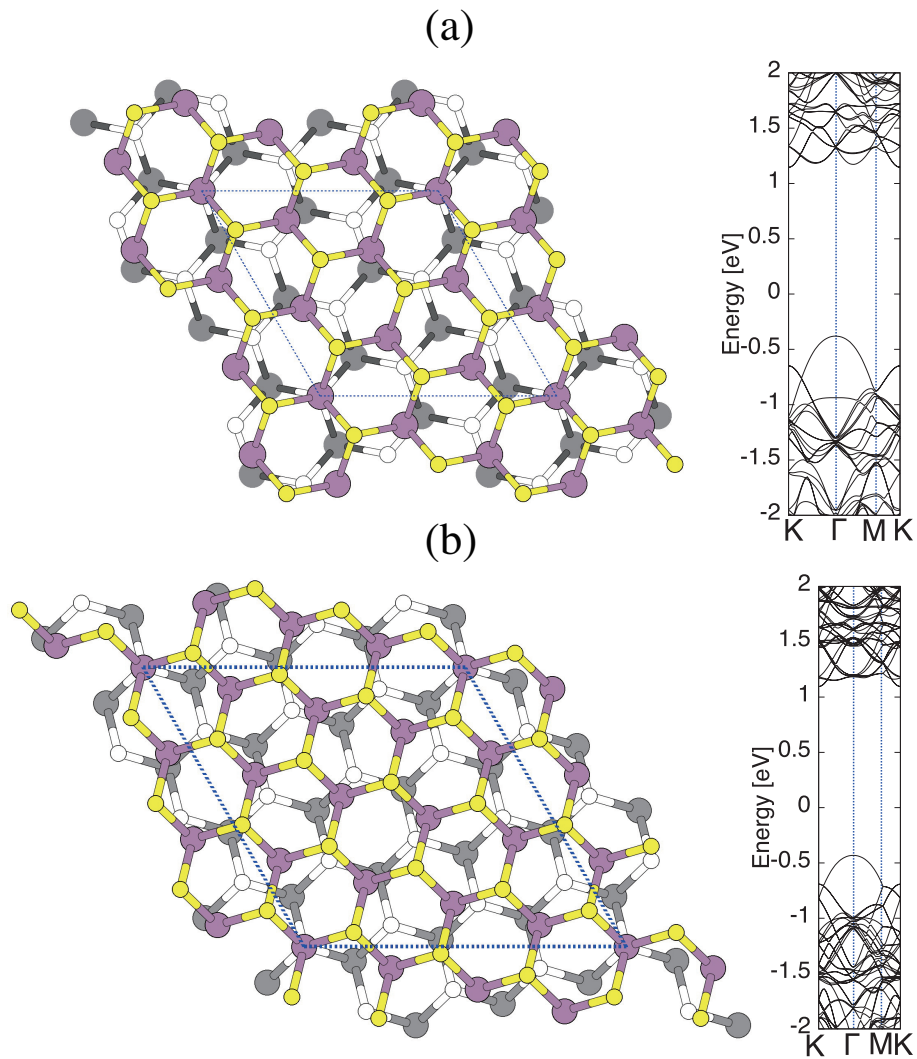

Figure S1: Electronic and geometric structures of twisted bilayer MoS<sub>2</sub> with twisted angles of (a) 38 and (b) 27°. Purple and gray large balls indicate Mo atoms belonging to the top and bottom layers, respectively. Yellow and white small balls indicate S atoms belonging to the top and bottom layers, respectively. The energy is measured from that of the vacuum level. The valence band top is indicated by the arrow.

# Effective Screening Medium Method

In ordinary density functional theory (DFT) calculations, the electronic structure of matters is solved under the periodic boundary condition along  $x$ ,  $y$ , and  $z$  directions. Thus, as for the electrostatic potential, we have a Poisson equation

$$\nabla \cdot [\epsilon(\mathbf{r})\nabla]V(\mathbf{r}) = -4\pi\rho_{tot}(\mathbf{r}), \quad (1)$$

where  $\epsilon(\mathbf{r})$  is the permittivity possessing the spatial dependence. By using the Green's function, the Poisson equation is expressed

$$\nabla \cdot [\epsilon(\mathbf{r})\nabla]G(\mathbf{r}, \mathbf{r}') = -4\pi\delta(\mathbf{r} - \mathbf{r}'). \quad (2)$$

Then, electrostatic potential  $V(\mathbf{r})$  is obtained by using the Green's function as

$$V(\mathbf{r}) = \int d\mathbf{r}' G(\mathbf{r}, \mathbf{r}')\rho_{tot}(\mathbf{r}'). \quad (3)$$

In the present work, to apply the electric field along  $z$  direction together with the excess carriers, we assume that the relative permittivity only depends along  $z$  direction (Figure S2). The choice of the permittivity leads to the anisotropic Poisson equation

$$\partial_z[\epsilon(z)\partial_z] - \epsilon(z)g_{\parallel}^2 G(\mathbf{g}_{\parallel}, z, z') = -4\pi\delta(z - z'), \quad (4)$$

where  $\mathbf{g}_{\parallel}$  and  $g_{\parallel}$  denote the wave vector parallel to the layer and absolute value of  $\mathbf{g}_{\parallel}$ . Then, the Green's function is determined by the conditions,

$$V(\mathbf{g}_{\parallel}, \frac{c}{2}) = \phi_T \quad (5)$$

$$V(\mathbf{g}_{\parallel}, -\frac{c}{2}) = \phi_B \quad (6)$$

$$(7)$$

with the  $z$  dependent permittivity

$$\epsilon(z) = \begin{cases} 1 & \text{if } |z| \leq \frac{c}{2} \\ \infty & \text{if } |z| \geq \frac{c}{2} \end{cases} \quad (8)$$

Accordingly, we can calculate the slab under electric field corresponding to the potential difference  $V_T + V_B (= \phi_T - \phi_B)$  between cell boundaries along  $z$  direction and the excess carrier  $Q$  with counter carriers  $q_T + q_B (= Q)$ .

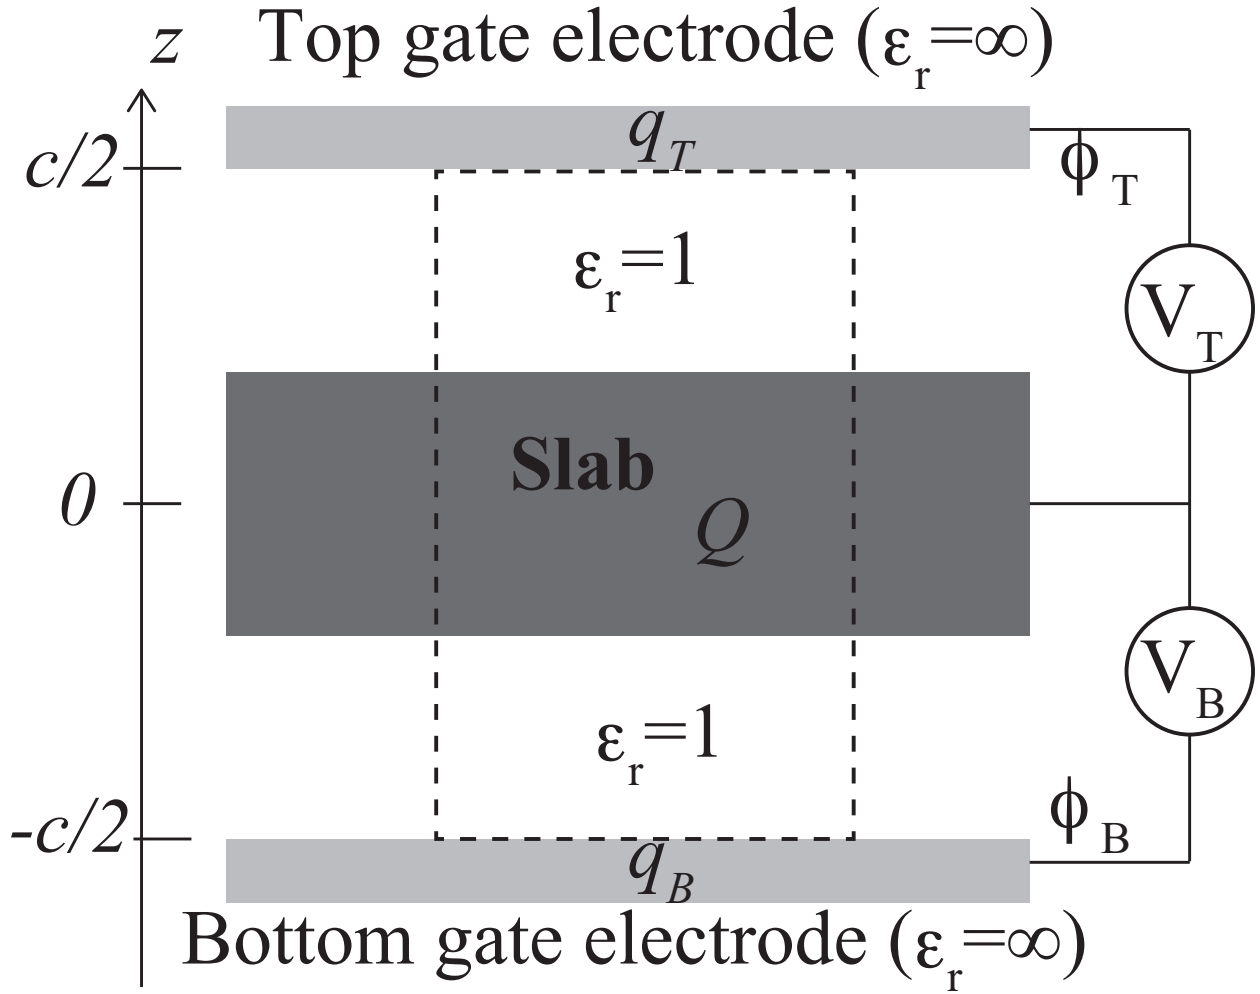

Figure S2: Calculation model using the DFT combined with the ESM method.
